# Supplementary material for: Synthesis, transfer, and characterization of core-shell gold-coated magnetic nanoparticles
Source: PubMed Central journal article supplement (PMC6396083; doi:10.1016/j.mex.2019.02.006), 2019-02-08
Supplement: mmc1.pdf [file mmc1.pdf]

**Supplementary material *and/or* Additional information:**

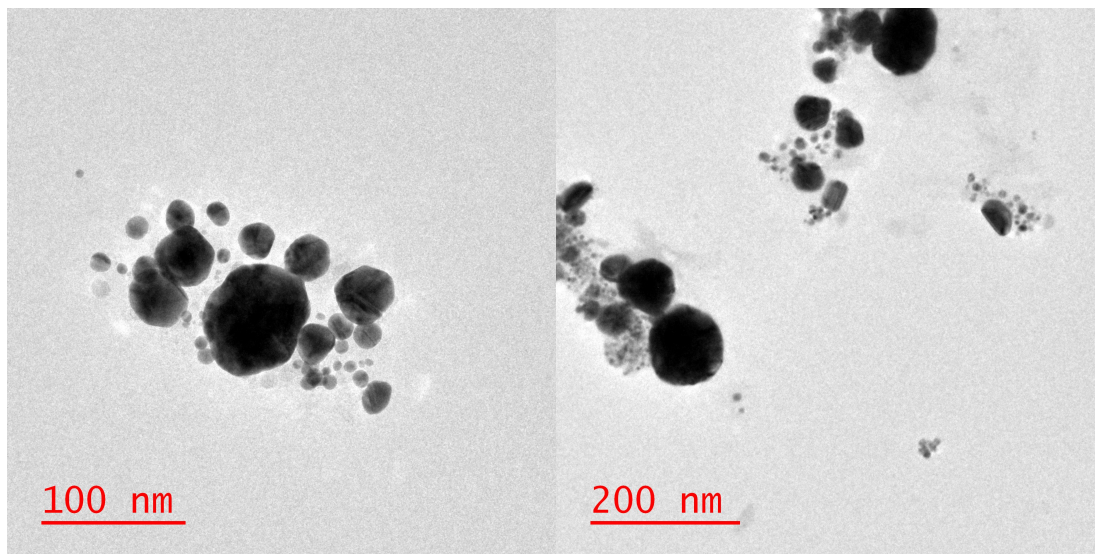

**Fig. S3.** HRTEM images of Fe<sub>3</sub>O<sub>4</sub>-AuNPs synthesized for 1.5 hours without an incremental increase in temperature (10°C/minute) (200 and 100 nm scale bars)

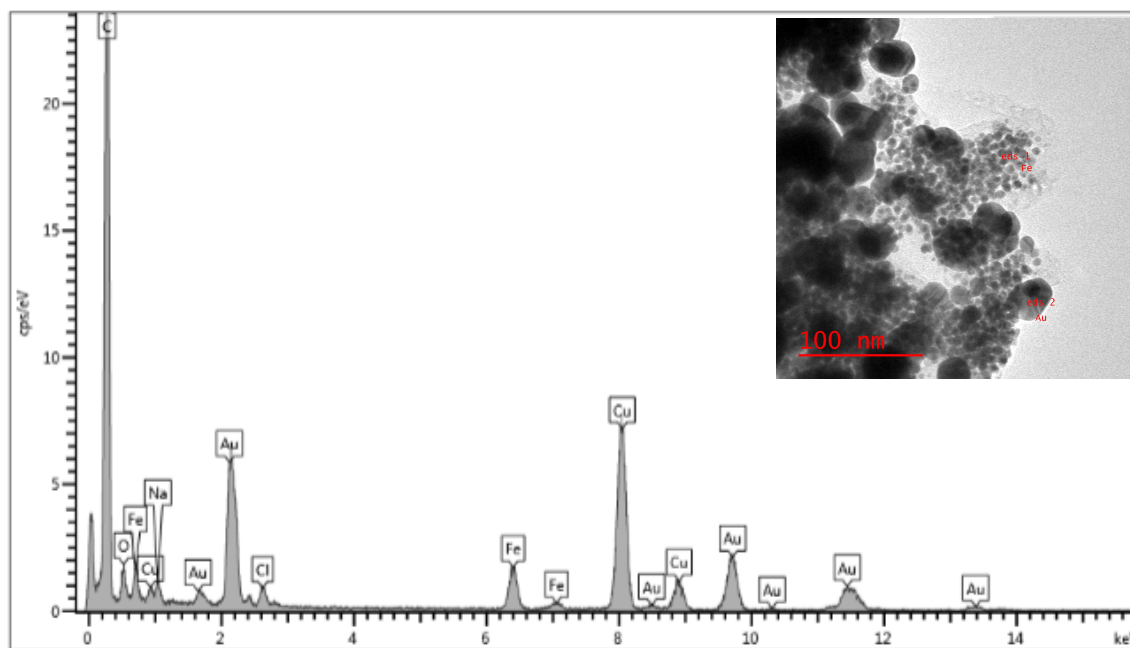

**Fig. S4A.** HRTEM image and corresponding EDS spectra of Fe<sub>3</sub>O<sub>4</sub>-AuNPs synthesized for 1.5 hours without an incremental increase in temperature (10°C/minute)

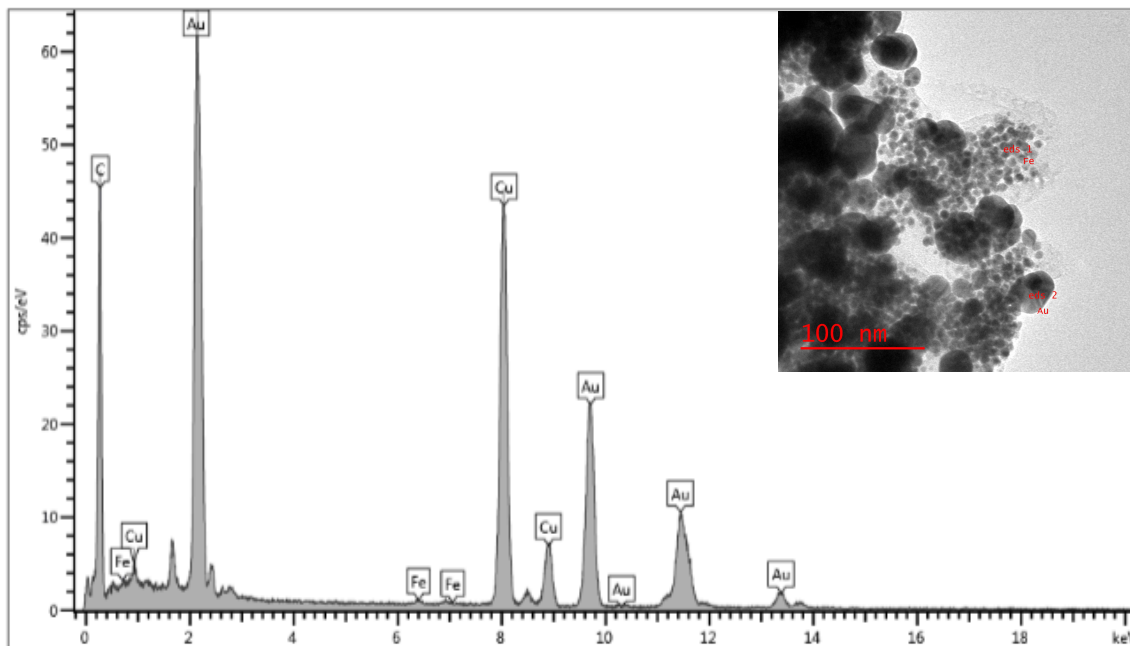

**Fig. S4B.** HRTEM image and corresponding EDS spectra of  $\text{Fe}_3\text{O}_4$ -AuNPs synthesized for 1.5 hours without an incremental increase in temperature ( $10^\circ\text{C}/\text{minute}$ )

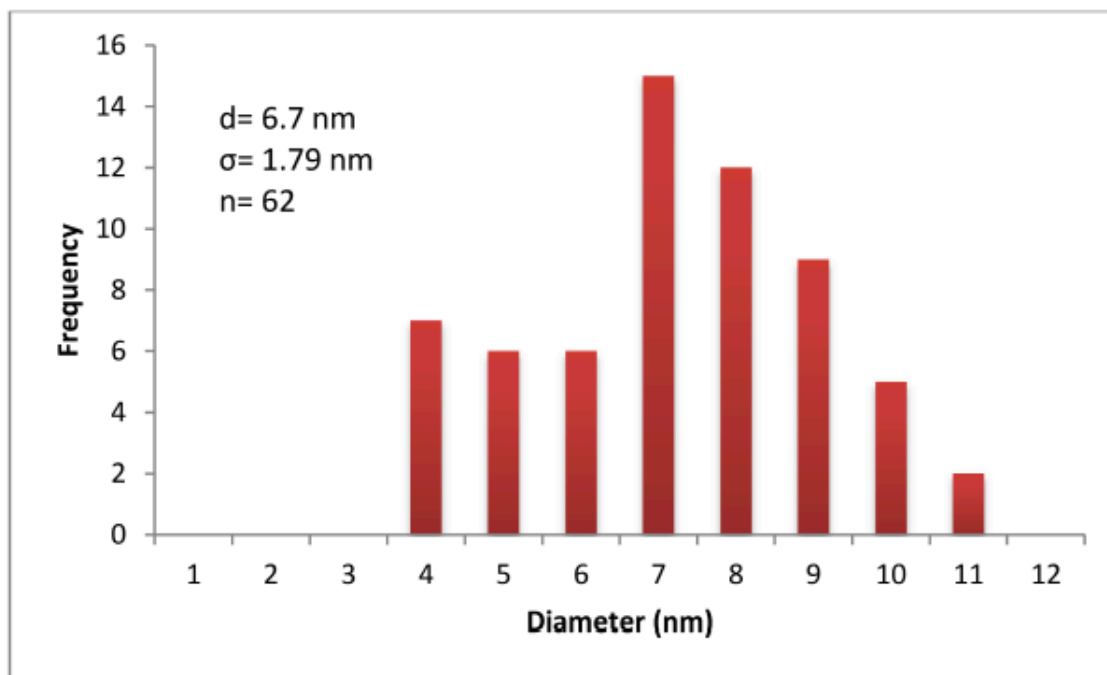

**Fig. S5.** Size distribution of  $\text{Fe}_3\text{O}_4$ -AuNPs synthesized for 1.5 hours without an incremental increase in temperature ( $10^\circ\text{C}/\text{minute}$ )

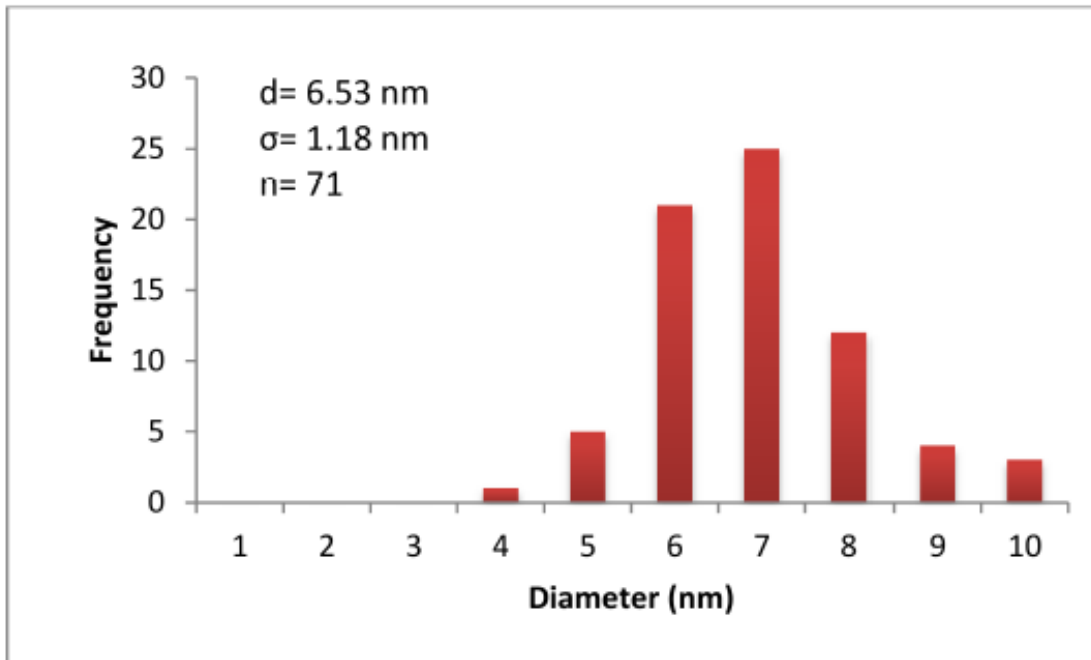

**Fig. S6.** Size distribution of  $\text{Fe}_3\text{O}_4$ -AuNPs synthesized for 3 hours with an incremental increase in temperature ( $10^\circ\text{C}/\text{minute}$ )

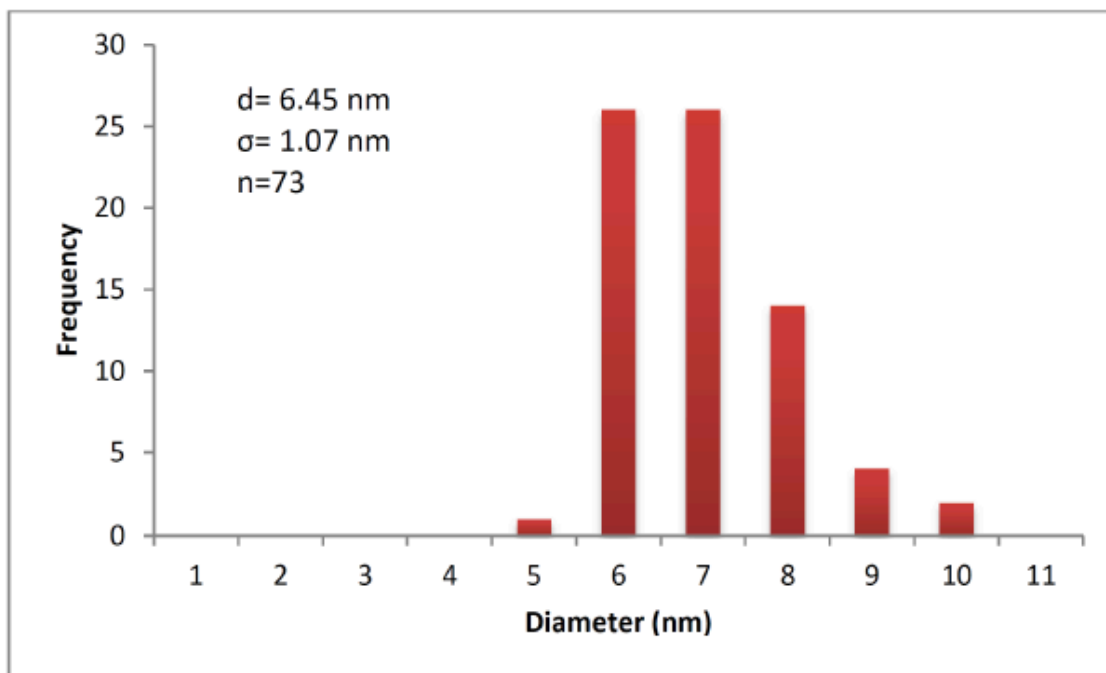

**Fig. S7.** Size distribution of DMAP transferred  $\text{Fe}_3\text{O}_4$ -AuNPs

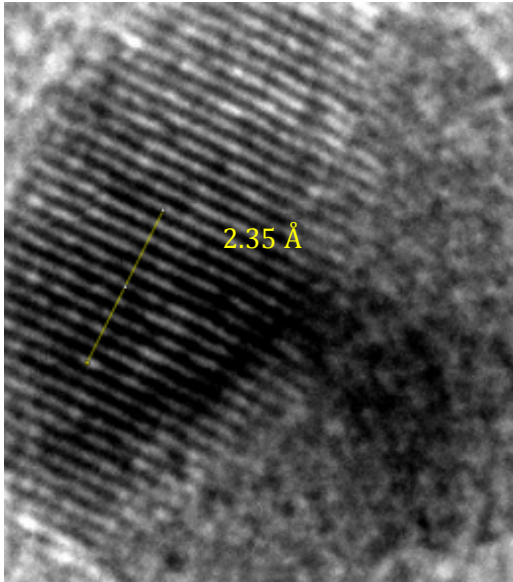

**Fig. S8.** HRTEM image of  $\text{Fe}_3\text{O}_4$ -AuNPs displaying the distance over an average of 10 lattice spacings

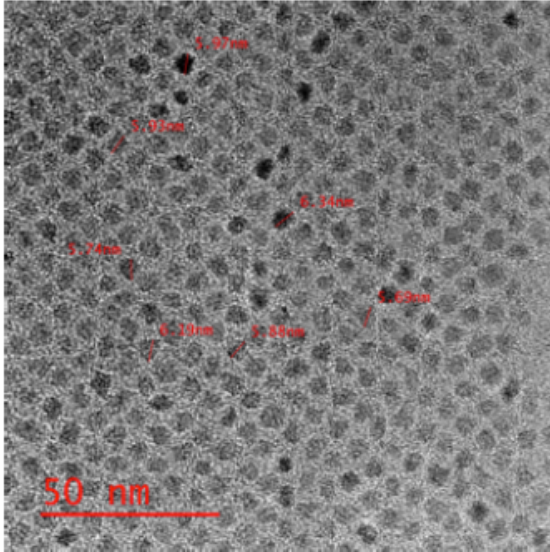

**Fig. S9.** HRTEM image displaying the average size distribution of  $\text{Fe}_3\text{O}_4$  NPs with a 50 nm scale bar



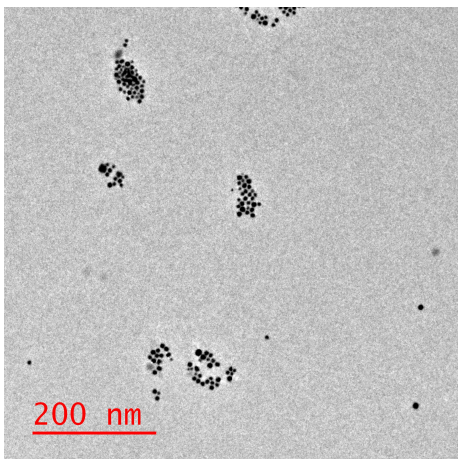

**Fig. S10.** HRTEM image of TMAOH transferred citrate-capped  $\text{Fe}_3\text{O}_4$ - AuNPs with a 200 nm scale bar

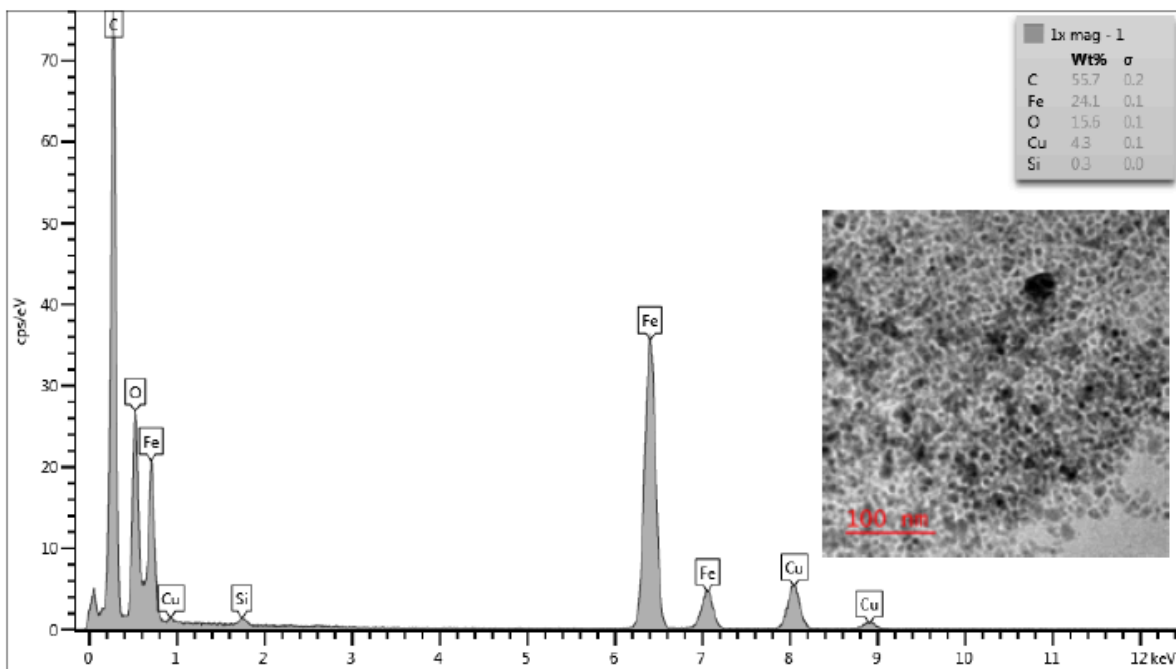

**Fig. S11.** TEM image with a 100 nm scale bar and associated EDS analysis of nanoparticles on the magnet after a mix of  $\text{Fe}_3\text{O}_4$  nanoparticles and AuNPs were separated by magnetic separation

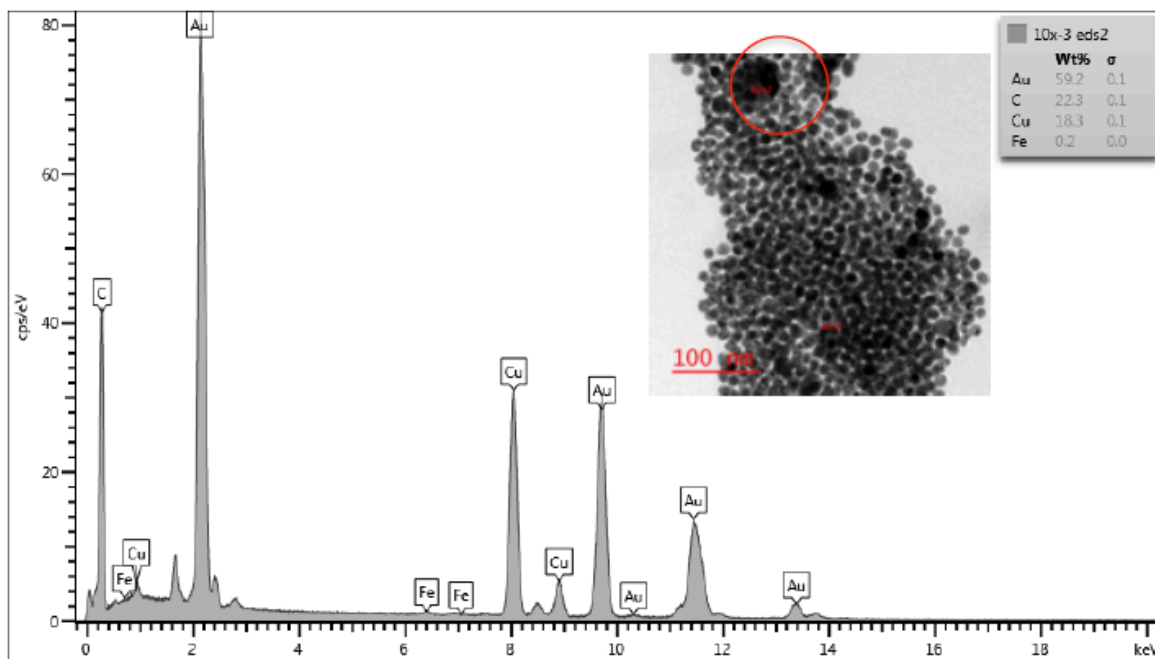

**Fig. S11.** TEM image with 100 nm scale bar and associated EDS analysis of nanoparticles in the supernatant after a mix of Fe<sub>3</sub>O<sub>4</sub> nanoparticles and AuNPs were separated by magnetic separation
